# Supplementary material for: Polyphosphate coacervate gels for manufacturing of manganese loaded glass powders and fibres: structural, cytocompatibility and surface bioactivity study
Source: Royal Society of Chemistry journal article supplement (doi:10.1039/d5tb00454c), 2025-01-01
Supplement: d5tb00454c1.pdf [file d5tb00454c1.pdf]

## Supporting Information

**Table SI-1.** Compositions of PGPs and PGFs expressed in atomic % measured via EDX.

| Sample   | P          | Ca        | Na        | Mn        | O          |
|----------|------------|-----------|-----------|-----------|------------|
| PGP-Mn0  | 20.5 ± 0.4 | 8.1 ± 0.2 | 4.1 ± 0.2 | -         | 67.3 ± 0.9 |
| PGP-Mn1  | 21.9 ± 0.4 | 6.2 ± 0.5 | 3.5 ± 0.3 | 0.2 ± 0.3 | 68.2 ± 0.4 |
| PGP-Mn3  | 20.0 ± 0.3 | 7.4 ± 0.2 | 3.9 ± 0.4 | 0.6 ± 0.5 | 68.1 ± 1.1 |
| PGP-Mn5  | 20.9 ± 0.4 | 6.9 ± 0.5 | 3.6 ± 0.5 | 1.0 ± 0.4 | 67.6 ± 0.5 |
| PGP-Mn10 | 20.5 ± 0.5 | 6.6 ± 0.4 | 2.1 ± 0.2 | 2.2 ± 0.4 | 68.6 ± 1.0 |
| PGF-Mn0  | 20.5 ± 0.8 | 6.5 ± 0.3 | 4.2 ± 0.5 | -         | 68.8 ± 1.2 |
| PGF-Mn1  | 20.7 ± 0.5 | 5.4 ± 0.4 | 4.2 ± 0.2 | 0.2 ± 0.4 | 69.5 ± 0.4 |
| PGF-Mn3  | 20.8 ± 0.4 | 5.0 ± 0.5 | 3.2 ± 0.4 | 0.6 ± 0.4 | 70.4 ± 0.8 |
| PGF-Mn5  | 21.8 ± 0.7 | 5.2 ± 0.2 | 1.7 ± 0.4 | 1.1 ± 0.5 | 70.3 ± 1.5 |
| PGF-Mn10 | 22.3 ± 0.9 | 4.0 ± 0.4 | 1.2 ± 0.8 | 2.2 ± 0.3 | 70.3 ± 0.6 |

Table SI-2. Summary of key references on PGs.

| <i>Synthesis</i> | <i>Morphology</i> | <i>TMI</i>       | <i>Mol %</i> | <i>Cytocompatibility</i>                                                                                                                                                                                                                                                                                  | <i>Antimicrobial properties</i>                                                                                                                                     | <i>Properties</i>                                                                                                                                                                                                                                                                                                                        | <i>Ref</i> |
|------------------|-------------------|------------------|--------------|-----------------------------------------------------------------------------------------------------------------------------------------------------------------------------------------------------------------------------------------------------------------------------------------------------------|---------------------------------------------------------------------------------------------------------------------------------------------------------------------|------------------------------------------------------------------------------------------------------------------------------------------------------------------------------------------------------------------------------------------------------------------------------------------------------------------------------------------|------------|
| SG               | Mesoporous PGP    | Sr <sup>2+</sup> | 1-3-5        |                                                                                                                                                                                                                                                                                                           |                                                                                                                                                                     | Pore size 11.8-18.6 nm. Specific Surface Area (SSA) 123-73 m <sup>2</sup> /g. Sr <sup>2+</sup> acts as a cross-linker. Good drug delivery system (DDS).                                                                                                                                                                                  | 43         |
| SG               | Mesoporous PGP    | Cu <sup>2+</sup> | 1-3-5        |                                                                                                                                                                                                                                                                                                           | Antibacterial effect against <i>S. aureus</i> from day 1 (3 and 5 mol% of Cu <sup>2+</sup> ). Activity against <i>E. coli</i> was for all compositions after day 2. | Pore size 8-20 nm. SSA 124-67 m <sup>2</sup> /g. The role of Cu <sup>2+</sup> changes from network modifying to network forming with increasing Cu <sup>2+</sup> content. Good DDS.                                                                                                                                                      | 44         |
| SG               | Mesoporous PGP    | Zn <sup>2+</sup> | 1-3-5        |                                                                                                                                                                                                                                                                                                           |                                                                                                                                                                     | Average pore size ~12 nm. SSA 124-76 m <sup>2</sup> /g. Good DDS.                                                                                                                                                                                                                                                                        | 45         |
| COA              | PGP               | Zn <sup>2+</sup> | 2-10-15      | MTT assay on MG-63 and HaCaTs cells. Good cell viability of all PGs, with slightly reduced cell viability at higher loadings. ~ 100% for MG-63 ≥ 69% for HaCaTs                                                                                                                                           |                                                                                                                                                                     | Zn <sup>2+</sup> adopts a 6-coordinate geometry. Good DDS.                                                                                                                                                                                                                                                                               | 42         |
| COA              | PGP               | Cu <sup>2+</sup> | 2-10-15      | MTT assay on MG-63 and HaCaTs cells. Good cell viability of all PGs, with slightly reduced cell viability at higher loadings. ≥ 79% for MG-63 ≥ 73% for HaCaTs                                                                                                                                            |                                                                                                                                                                     | Cu <sup>2+</sup> adopts a 4-coordinate geometry. Good DDS.                                                                                                                                                                                                                                                                               | 42         |
| ES-COA           | PGF               | Cu <sup>2+</sup> | 1-3-5        | Cu <sup>2+</sup> enhancement of MG-63 viability and proliferation.                                                                                                                                                                                                                                        | Cu <sup>2+</sup> has antibacterial activity against <i>S. aureus</i> and <i>E. coli</i> .                                                                           | PGFs average diameter 1-3 μm. Cu <sup>2+</sup> acts as cross-linker.                                                                                                                                                                                                                                                                     | 13         |
| ES-COA           | PGF               | Ag <sup>+</sup>  | 1-2-4-6-10   | Dissolution products non-toxic against HaCaTs.<br><br>Enhancement of wound closure in <i>ex vivo</i> models, (≥ 4 mol % Ag <sup>+</sup> )<br><br>HaCaT migration/proliferation demonstrated by <i>in vitro</i> scratch assays starting from PGF-Ag6, reaching 72% closure with 10 mol % Ag <sup>+</sup> . | PGF-Ag (Ag <sub>2</sub> O ≥ 4 mol%) antibacterial activity against <i>S. aureus</i> and <i>E. coli</i> .                                                            | PGFs average diameter 4.2 μm. Good DDS.                                                                                                                                                                                                                                                                                                  | 9          |
| ES-COA           | PGF               | Zn <sup>2+</sup> | 1-2-4-6-10   | Dissolution products non-toxic against HaCaTs.                                                                                                                                                                                                                                                            | PGF-Zn10 antibacterial activity against <i>S. aureus</i>                                                                                                            | PGFs average diameter: 1.4 μm. Good DDS.                                                                                                                                                                                                                                                                                                 | 9          |
| ES-COA           | PGF               | Fe <sup>3+</sup> | 1-2-4        | Dissolution products are non-toxic against HaCaTs. Acceleration of healing in chronic wounded skin via <i>ex vivo</i> assay (> 30%) on 1 mol% Fe.                                                                                                                                                         |                                                                                                                                                                     | PGFs average diameter 5.2 μm. Good DDS.                                                                                                                                                                                                                                                                                                  | 9          |
| ES-COA-SUP       | Porous PGF        | Ga <sup>3+</sup> | 0.2-0.5-1    | All PGF dissolution products are non-toxic against HaCaTs.                                                                                                                                                                                                                                                | PGFs have antibacterial activity against <i>E. coli</i> . 1 mol% Ga <sup>3+</sup> has antibacterial activity against <i>S. aureus</i> .                             | Pores diameters from 100 nm to 2 μm. Ga <sup>3+</sup> acts as cross-linker. All PGFs are able to encapsulate clove oil (99.99 %). Clove oil is mostly released within the first 6 hours. The presence of Ga <sup>3+</sup> promotes the release of clove oil. Clove oil and Ga <sup>3+</sup> enhanced the antioxidant properties of PGFs. | 14         |

COA = coacervation; ES-COA = ES of the coacervate gel; ES-COA-SUP = ES of the coacervate gel combined with the supramolecular templating technique

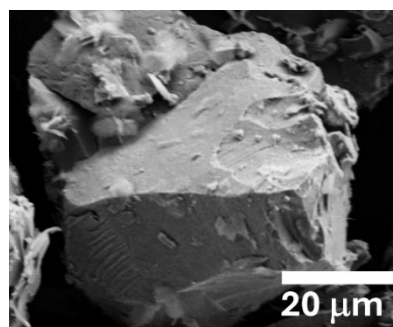

Figure SI-1. SEM image of PGP-Mn1

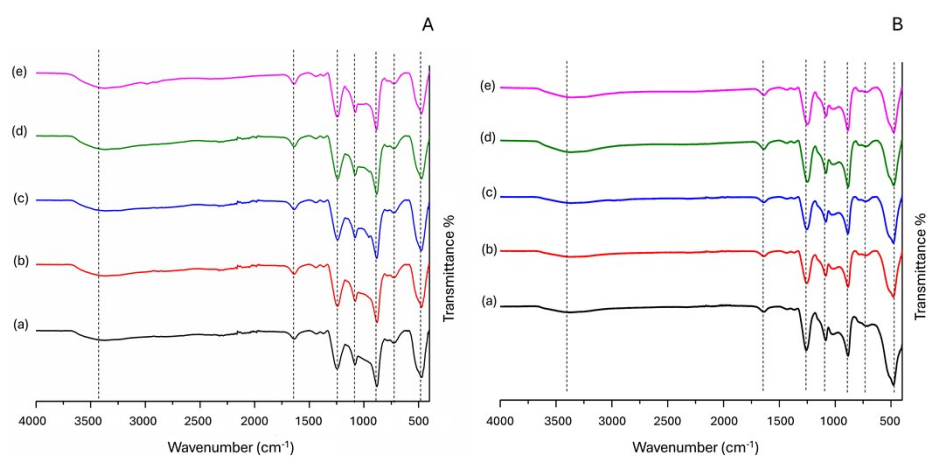

Figure SI-2. FT-IR spectra of A): (a) PGP-Mn0; (b) PGP-Mn1; (c) PGP-Mn3; (d) PGP-Mn5; (e) PGP-Mn10 and B): (a) PGF-Mn0; (b) PGF-Mn1; (c) PGF-Mn3; (d) PGF-Mn5; (e) PGF-Mn10.

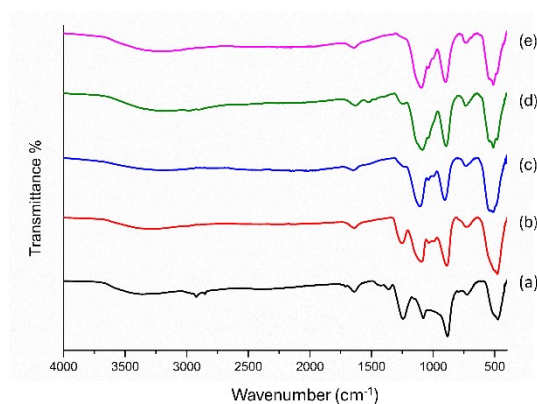

Figure SI-3. FT-IR spectra of PGP-Mn1 before (a) and after immersion in CM for 24 h (b), 72 h (c) and after immersion in Tris-B for 24 h (d), 72 h (e).
